# Supplementary material
Source: MDPI journal article supplement (https://www.mdpi.com/2071-1050/12/8/3207)
Supplement: s1 [file s1]

## Supplementaru Materials: Questionnaire

### Personal Status & General Information

Q1. Sex

☐ Male

☐ Female

☐ Other:

Q2. Age

☐ 17 or below

☐ 26-35

☐ 46-55

☐ 18-25

☐ 36-45

☐ 56 and more

Q3. Status

☐ Unemployed

☐ Entrepreneur

☐ Other:

☐ Student

☐ Retired

☐ Employed

☐ Houseperson

Q4. Highest education achieved

☐ Primary (5th)

☐ Higher Secondary (12th)

☐ Doctorate, Medical or Law degree or higher

☐ Upper Primary (8th)

☐ Bachelor

☐ Secondary (10th)

☐ Master

Q5. Residential place \*(choose one)

☐ Kerala

☐ Telangana

☐ Lakshadweep Islands (union territory)

☐ Tamil Nadu

☐ Pondicherry (union territory)

☐ Andaman and Nicobar Islands (union territory)

☐ Karnataka

☐ Andra Pradesh

### E-Mail and Internet Communication

Q6. Do you have an e-mail address?

☐ Yes

☐ No

a. If yes:

Q6.1. On average, how many e-mails do you send approximately per day?

Q6.2. On average, how many e-mails do you receive approximately per day?

(Scale for both questions)

☐ None

☐ 4-9

☐ 1-3

☐ 10 and more

Q7. How often do you use the following social media and communication channels?

|           | Almost daily             | At least once a week     | Less often than once a week | Never                    |
|-----------|--------------------------|--------------------------|-----------------------------|--------------------------|
| Facebook  | <input type="checkbox"/> | <input type="checkbox"/> | <input type="checkbox"/>    | <input type="checkbox"/> |
| WhatsApp  | <input type="checkbox"/> | <input type="checkbox"/> | <input type="checkbox"/>    | <input type="checkbox"/> |
| Viber     | <input type="checkbox"/> | <input type="checkbox"/> | <input type="checkbox"/>    | <input type="checkbox"/> |
| Instagram | <input type="checkbox"/> | <input type="checkbox"/> | <input type="checkbox"/>    | <input type="checkbox"/> |
| Twitter   | <input type="checkbox"/> | <input type="checkbox"/> | <input type="checkbox"/>    | <input type="checkbox"/> |

Q8. Which of the following devices do you personally own?

☐ Smartphone

☐ PC or Notebook

☐ None

☐ Keypad Cellphone

☐ E-book reader

☐ Tablet

☐ Video-Game console

Q9. Which of the following apps do you personally use?

☐ Google Drive

☐ iCloud

☐ None

☐ OneDrive

☐ DropBox

### Industry 4.0 Awareness (In General)

Q10. Before now, have you ever heard about Cloud Solutions so far?

Clouds are online servers that provide you free space for your files (music, photos, documents).

Q11. Before now, have you ever heard about Mass Customization so far?

Mass customization describes the ability to design and produce customized products with the same efficiency and speed of the current mass uncustomized production process, without affecting costs negatively.

**Q12.** Before now, have you ever heard about the Internet of Things so far?

The Internet of Things (IoT) is a concept that describes the idea of everyday physical objects, computers, cell phones, people, manufacturing machines, being connected to the internet. In the IoT, the connected devices should be able to identify themselves and communicate to other devices without human interaction.

**Q13.** Before now, have you ever heard about the Industry 4.0 concept so far? (so called 4th Industrial revolution)

Industry 4.0 represents the 4th industrial revolution that has occurred in manufacturing. Industry 4.0 brings the ability of machines, devices, sensors, and people to connect and communicate with each other via the Internet of Things (IoT). It's linked to the 3rd industrial revolution, where we are using interaction between human and machine, where machines are automated and involved in manufacturing processes.

**Q14.** Before now, have you ever heard about Smart Manufacturing so far?

Smart Manufacturing is a combination of capabilities from multiple areas to improve productivity using automated processes and data collection.

**Q15.** Before now, have you ever heard about Smart Cities so far?

Smart City is a city where all infrastructure, processes, and services linked to lifecycle of the city include smart solutions and IoT connected parts that are managed through the server.

**Q16.** Before now, have you ever heard about 5G so far?

5G is the fifth generation of mobile networks (replaces the current 4G and Long-Term Evolution networks). It allows data transfer in between devices with multiplied speed compared to current 4G.

**Q17.** Do you have any previous experience with IoT or I4.0 concept?

**Scale for Q10–Q17**

☐ Yes

☐ No

### South India Region

**Q18.** In your opinion, is IoT and Industry 4.0 concept implementation important for South India's SMEs?

SMEs—Small and Medium Enterprises. Small enterprises in India—less than 100 employees. Medium enterprises in India—100–999 employees.

**Q19.** In your opinion, is IoT and I4.0 concept cost-effective for South India's SMEs?

**Q20.** In your opinion, are South India's SMEs ready to implement IoT and I4.0 concept?

**Q21.** In your opinion, how important is it for South India's SMEs to invest in training their workers for new technological processes and prepare them for IoT and other innovations in manufacturing?

**Q22.** In your opinion, how important is it for SMEs in South India to approach Smart Manufacturing?

**Q23.** In your opinion, how important is e-Commerce for South India's SMEs?

E-Commerce is the activity of buying or selling products on online services or over the Internet (i.e., on-line shopping).

**Scale for Q18 and Q21–Q23**

|                     | Not at all important     | Slightly important       | No opinion (I don't know) | Fairly important         | Very important           |
|---------------------|--------------------------|--------------------------|---------------------------|--------------------------|--------------------------|
| <b>Your Opinion</b> | <input type="checkbox"/> | <input type="checkbox"/> | <input type="checkbox"/>  | <input type="checkbox"/> | <input type="checkbox"/> |

**Q24.** In your opinion, in which order should be transformation process be implemented in SMEs?

Smart Logistics means that all operations and processes associated with the logistics of goods are controlled by autonomous operating systems. Smart Manufacturing is a combination of capabilities from multiple areas to improve productivity using automated processes and data collection. Organizational and Business model is a plan for the successful operation of a business, identifying sources of revenue, the intended customer base, products, and details of financing. (For each column choose only one answer)

|                                           | 1                        | 2                        | 3                        |
|-------------------------------------------|--------------------------|--------------------------|--------------------------|
| <b>Smart Logistics</b>                    | <input type="checkbox"/> | <input type="checkbox"/> | <input type="checkbox"/> |
| <b>Smart Manufacturing</b>                | <input type="checkbox"/> | <input type="checkbox"/> | <input type="checkbox"/> |
| <b>Organizational and Business models</b> | <input type="checkbox"/> | <input type="checkbox"/> | <input type="checkbox"/> |

Q25. In your opinion, is IoT and I4.0 concept implementation important for you personally?

Scale for Q19, Q20, and Q25

|              | No                       | Rather no                | No opinion (I don't know) | Rather yes               | Yes                      |
|--------------|--------------------------|--------------------------|---------------------------|--------------------------|--------------------------|
| Your Opinion | <input type="checkbox"/> | <input type="checkbox"/> | <input type="checkbox"/>  | <input type="checkbox"/> | <input type="checkbox"/> |

Q26. How many times in the last 12 months did you shop online?

|        | 0                        | 1-2                      | 3-5                      | 6-9                      | 10-19                    | 20 and more              |
|--------|--------------------------|--------------------------|--------------------------|--------------------------|--------------------------|--------------------------|
| Answer | <input type="checkbox"/> |

Q27. In your opinion, do you see any Smart City in South India in next 10 years?

- ☐ Yes
- ☐ No opinion
- ☐ No
